# Supplementary material for: Efficacy of neck muscle activation versus strengthening for adults with chronic cervical radiculopathy: a study protocol for a randomised clinical trial
Source: PubMed Central journal article supplement — BMJ Open Sport Exerc Med. 2024 Feb 14;10(1):e001819. doi: 10.1136/bmjsem-2023-001819 (PMC10868178; doi:10.1136/bmjsem-2023-001819), 2024-02-14
Supplement: bmjsem-2023-001819supp002.pdf [file bmjsem-2023-001819supp002.pdf]

**Adverse event checklist (Put tick  $\checkmark$  and write comment if any adverse event notice and put cross X mark if no adverse event notice)**

**Adverse events list**

|    |                   |     |                                     |
|----|-------------------|-----|-------------------------------------|
| 1. | Fracture          | 8.  | Produce or increased radiating pain |
| 2. | Increased pain    | 9.  | Severe sweating                     |
| 3. | Muscle tenderness | 10. | Palpitations                        |
| 4. | Fainting          | 11. | Stroke                              |
| 5. | Vomiting          | 12. | Visual disturbance                  |
| 6. | Vertigo/Dizziness | 13. | Transient Ischemic Attack (TIA)     |
| 7. | Skin rash         | 14. | Loss of movement                    |

| Participants Serial No. | Week 1 | Week 2 | Week 3 | Week 4 | Week 5 |
|-------------------------|--------|--------|--------|--------|--------|
| P1                      |        |        |        |        |        |
| P2                      |        |        |        |        |        |
| P3                      |        |        |        |        |        |
| P4                      |        |        |        |        |        |
| P5                      |        |        |        |        |        |
| P6                      |        |        |        |        |        |
| P7                      |        |        |        |        |        |
| P8                      |        |        |        |        |        |
| P9                      |        |        |        |        |        |
| P10                     |        |        |        |        |        |
| P11                     |        |        |        |        |        |
| P12                     |        |        |        |        |        |
| P13                     |        |        |        |        |        |
| P14                     |        |        |        |        |        |
| P15                     |        |        |        |        |        |
| P16                     |        |        |        |        |        |
| P17                     |        |        |        |        |        |

|            |  |  |  |  |  |
|------------|--|--|--|--|--|
| <b>P18</b> |  |  |  |  |  |
| <b>P19</b> |  |  |  |  |  |
| <b>P20</b> |  |  |  |  |  |
| <b>P21</b> |  |  |  |  |  |
| <b>P22</b> |  |  |  |  |  |
| <b>P23</b> |  |  |  |  |  |
| <b>P24</b> |  |  |  |  |  |
| <b>P25</b> |  |  |  |  |  |
| <b>P26</b> |  |  |  |  |  |
| <b>P27</b> |  |  |  |  |  |
| <b>P28</b> |  |  |  |  |  |
| <b>P29</b> |  |  |  |  |  |
| <b>P30</b> |  |  |  |  |  |
| <b>P31</b> |  |  |  |  |  |
| <b>P32</b> |  |  |  |  |  |
| <b>P33</b> |  |  |  |  |  |
| <b>P34</b> |  |  |  |  |  |
| <b>P35</b> |  |  |  |  |  |
| <b>P36</b> |  |  |  |  |  |
| <b>P37</b> |  |  |  |  |  |
| <b>P38</b> |  |  |  |  |  |
| <b>P39</b> |  |  |  |  |  |
| <b>P40</b> |  |  |  |  |  |
| <b>P42</b> |  |  |  |  |  |
| <b>P43</b> |  |  |  |  |  |
| <b>P44</b> |  |  |  |  |  |
| <b>P45</b> |  |  |  |  |  |
| <b>P46</b> |  |  |  |  |  |
| <b>P47</b> |  |  |  |  |  |
| <b>P48</b> |  |  |  |  |  |

|            |  |  |  |  |  |
|------------|--|--|--|--|--|
| <b>P49</b> |  |  |  |  |  |
| <b>P50</b> |  |  |  |  |  |
| <b>P51</b> |  |  |  |  |  |
| <b>P52</b> |  |  |  |  |  |
| <b>P53</b> |  |  |  |  |  |
| <b>P54</b> |  |  |  |  |  |
| <b>P55</b> |  |  |  |  |  |
| <b>P56</b> |  |  |  |  |  |
| <b>P57</b> |  |  |  |  |  |
| <b>P58</b> |  |  |  |  |  |
| <b>P59</b> |  |  |  |  |  |
| <b>P60</b> |  |  |  |  |  |
| <b>P61</b> |  |  |  |  |  |
| <b>P62</b> |  |  |  |  |  |
| <b>P63</b> |  |  |  |  |  |
| <b>P64</b> |  |  |  |  |  |
| <b>P65</b> |  |  |  |  |  |
| <b>P66</b> |  |  |  |  |  |
| <b>P67</b> |  |  |  |  |  |
| <b>P68</b> |  |  |  |  |  |
| <b>P69</b> |  |  |  |  |  |
| <b>P70</b> |  |  |  |  |  |
| <b>P71</b> |  |  |  |  |  |
| <b>P72</b> |  |  |  |  |  |
| <b>P73</b> |  |  |  |  |  |
| <b>P74</b> |  |  |  |  |  |
| <b>P75</b> |  |  |  |  |  |
| <b>P76</b> |  |  |  |  |  |
| <b>P77</b> |  |  |  |  |  |
| <b>P78</b> |  |  |  |  |  |

|            |  |  |  |  |  |
|------------|--|--|--|--|--|
| <b>P79</b> |  |  |  |  |  |
| <b>P80</b> |  |  |  |  |  |

**Provide any additional adverse effects here**

|  |
|--|
|  |
|--|
